# Supplementary material
Source: publisher site journal article supplement (https://www.spandidos-publications.com/4532/downloadSupplementary)

Figure S1. Results of naringin in TFRD sample detected by liquid chromatograph-mass spectrometry. (A) EIC of the naringin reference substance (1  $\mu\text{g/ml}$ ). (B) EIC of the naringin in TFRD sample and (C) the standard curve line. EIC, extracted ion chromatography; TFRD, total flavonoids of *Rhizoma drynariae*.

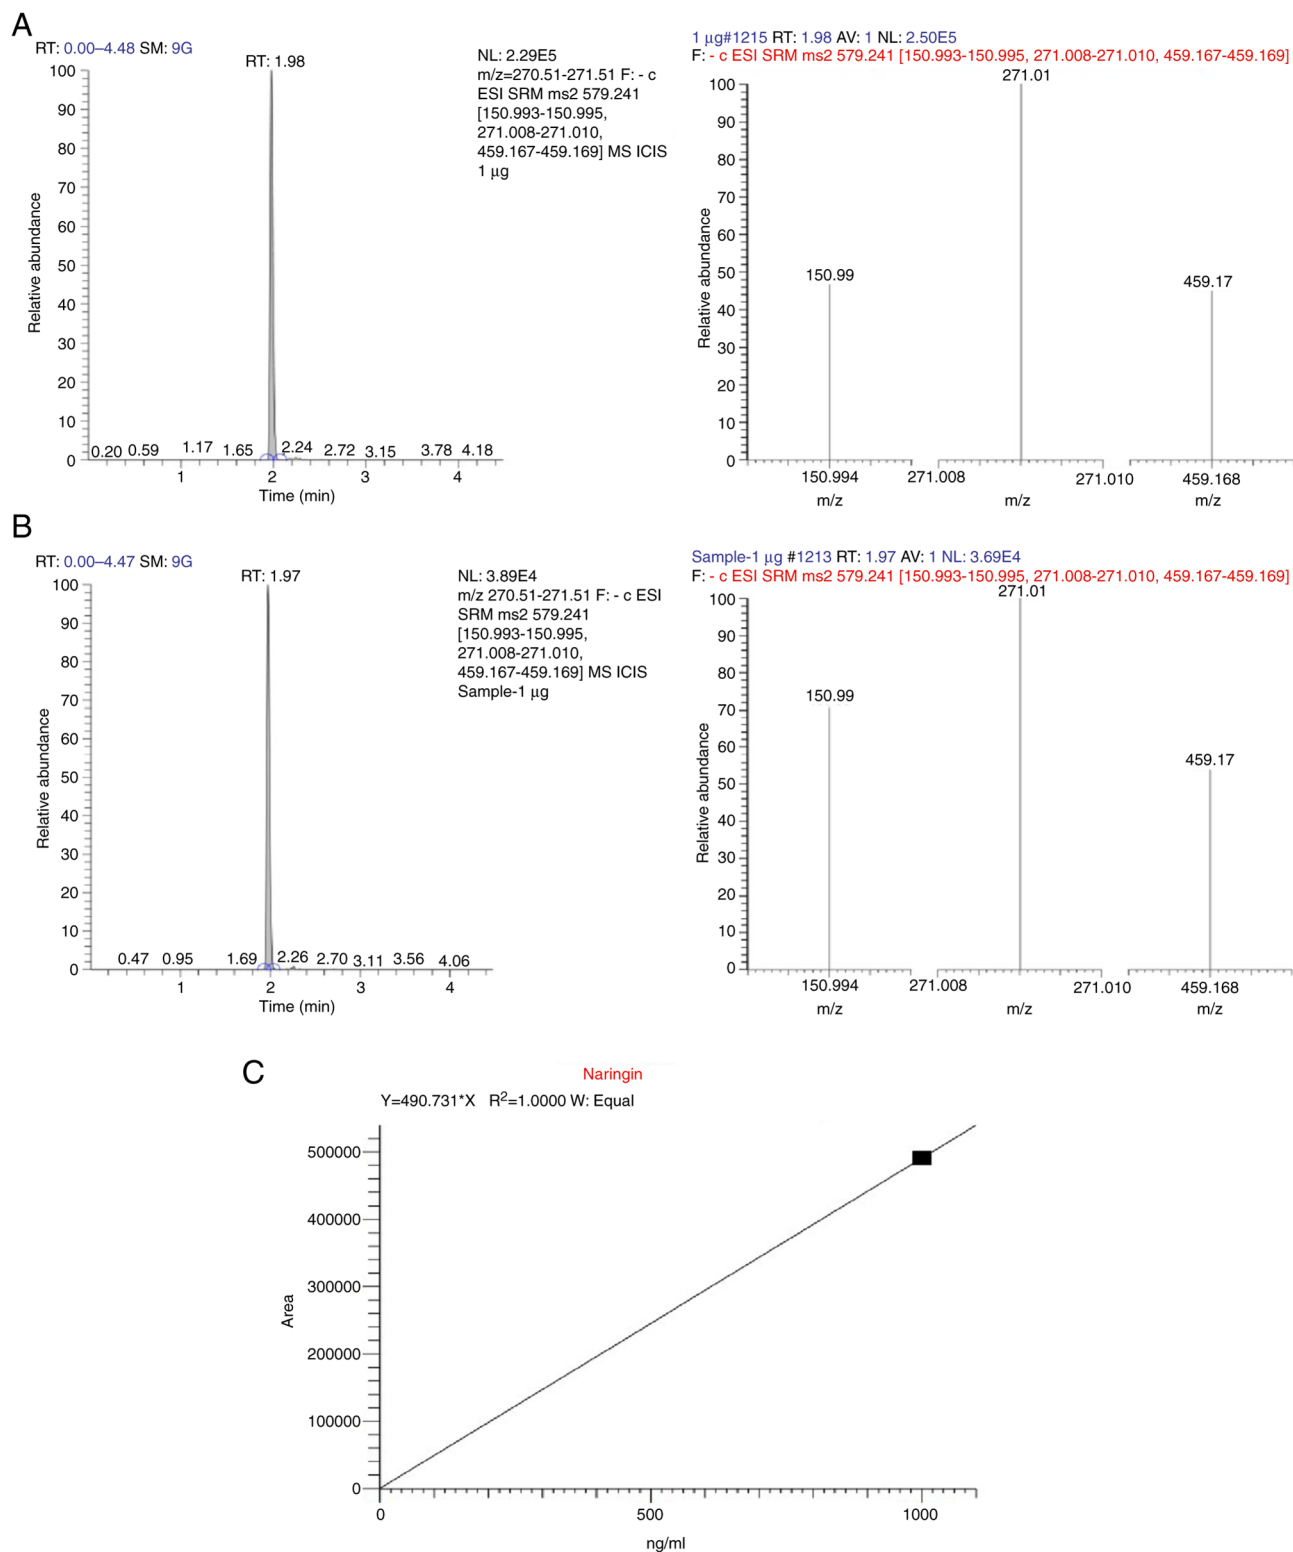

Figure S2. Results of neoeriocitrin in TFRD sample detected by liquid chromatograph-mass spectrometry. (A) EIC of the neoeriocitrin reference substance (1  $\mu\text{g}/\text{ml}$ ). (B) EIC of the neoeriocitrin in TFRD sample and (C) the standard curve line. EIC, extracted ion chromatography; TFRD, total flavonoids of *Rhizoma drynariae*.

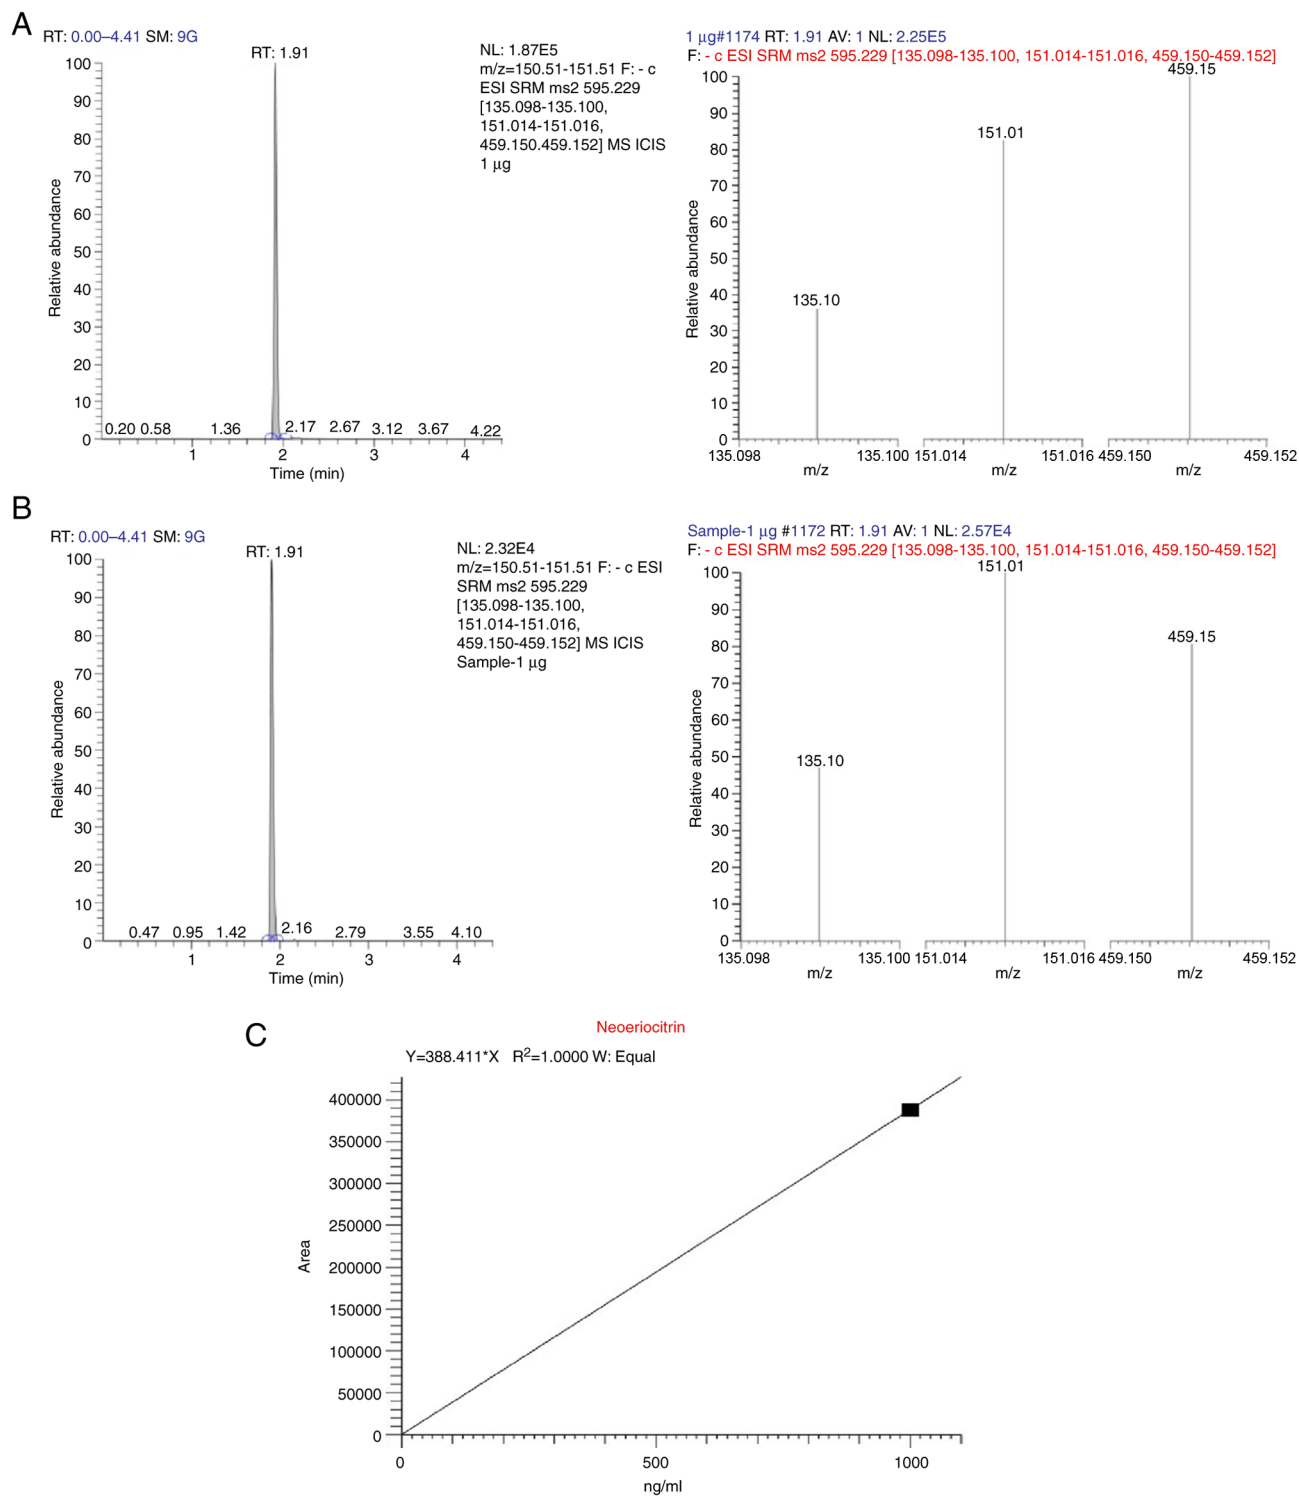

Supplement: Supplementary file 1 [file downloadSupplementary]
